# Supplementary material for: Trans- and Multigenerational Maternal Social Isolation Stress Programs the Blood Plasma Metabolome in the F3 Generation
Source: MDPI journal article supplement (doi:10.3390/metabo12070572), 2022-06-22
Supplement: s1 [file s1]

**Table S1:** Open Field test scores of rats at postnatal day 90. Total distance refers to the average total distance moved during a test session. Move time refers to the amount of time spent moving. Number of vertical moves refers to the number of times the rat stood on its hind legs. Vertical time refers to the amount of time the rat spent rearing. Time in margins refers to the amount of time the rat spent along the edges of the open field. Margin distance refers the distance travelled by the rat along the edges of the open field. Central distance refers to the distance the rat moved in the center of the open field. Body weight (g) refers to measurements on postnatal day 90. Means and standard deviation (Std. Deviation) for each test are reported.

| Open Field (P90) |                |                |             |                             |               |                 |                    |                  |             |
|------------------|----------------|----------------|-------------|-----------------------------|---------------|-----------------|--------------------|------------------|-------------|
| Rat ID           | Group          | Total Distance | Move Time   | Number of<br>Vertical Moves | Vertical Time | Time in Margins | Margin<br>Distance | Central Distance | Body weight |
| 1                | CONT           | 975            | 81.2        | 23                          | 51.7          | 342             | 484                | 491              | 536         |
| 3                | CONT           | 2752           | 264.3       | 50                          | 121.1         | 350.2           | 1453               | 1299             | 524         |
| 5                | CONT           | 2838           | 258.5       | 55                          | 171.3         | 489.3           | 2062               | 776              | 506         |
| 7                | CONT           | 2617           | 249.1       | 44                          | 182.5         | 359             | 1423               | 1194             | 449         |
| 9                | CONT           | 3057           | 240.2       | 38                          | 181.6         | 404.8           | 1872               | 1185             | 479         |
| 11               | CONT           | 1714           | 168         | 74                          | 171           | 452             | 1121               | 593              | 446         |
| 13               | CONT           | 3273           | 252.7       | 48                          | 211.8         | 390.8           | 1920               | 1353             | 522         |
| 15               | CONT           | 2530           | 193.3       | 43                          | 190           | 378.7           | 1220               | 1310             | 435         |
|                  | Mean           | 2469.5         | 213.4125    | 46.875                      | 160.125       | 395.85          | 1444.375           | 1025.125         | 487.125     |
|                  | Std. Deviation | 759.3318492    | 63.36295532 | 14.56451166                 | 50.77501495   | 51.58504767     | 516.6250194        | 348.8402981      | 40.08718178 |
| 17               | TPS            | 2006           | 172.8       | 50                          | 138.4         | 430.6           | 1113               | 893              | 500         |
| 19               | TPS            | 2540           | 198.3       | 44                          | 177.9         | 275.6           | 1072               | 1467             | 503         |
| 21               | TPS            | 1774           | 171.5       | 42                          | 149.3         | 405.1           | 986                | 789              | 433         |
| 23               | TPS            | 2308           | 211.3       | 60                          | 180.4         | 338.5           | 1123               | 1184             | 532         |
| 25               | TPS            | 1096           | 121.3       | 39                          | 117.1         | 383.1           | 415                | 681              | 510         |
| 27               | TPS            | 1414           | 127.7       | 37                          | 73.1          | 518.5           | 865                | 549              | 454         |
| 29               | TPS            | 1985           | 200.7       | 47                          | 183.8         | 497             | 1309               | 677              | 521         |

|    |                |             |             |             |             |             |             |             |             |
|----|----------------|-------------|-------------|-------------|-------------|-------------|-------------|-------------|-------------|
| 31 | TPS            | 2338        | 201.8       | 40          | 93.8        | 462.3       | 1575        | 763         | 506         |
|    | Mean           | 1932.625    | 175.675     | 44.875      | 139.225     | 413.8375    | 1057.25     | 875.375     | 494.875     |
|    | Std. Deviation | 489.3642924 | 34.58681623 | 7.453426825 | 41.75731758 | 81.33380842 | 336.7096036 | 304.5661727 | 33.81646894 |
| 33 | MPS            | 1346        | 136.2       | 43          | 119         | 514.1       | 1019        | 327         | 491         |
| 35 | MPS            | 1782        | 182         | 38          | 92          | 333         | 1005        | 777         | 458         |
| 37 | MPS            | 2281        | 200         | 37          | 124         | 439.5       | 1371        | 910         | 460         |
| 39 | MPS            | 2523        | 273.5       | 44          | 128         | 383.9       | 1480        | 1043        | 502         |
| 41 | MPS            | 2381        | 244.7       | 39          | 182.3       | 427.7       | 1650        | 731         | 469         |
| 43 | MPS            | 1988        | 190.4       | 37          | 123.3       | 481.5       | 1174        | 814         | 480         |
| 45 | MPS            | 3726        | 275.1       | 51          | 150         | 480.9       | 2554        | 1172        | 493         |
| 47 | MPS            | 1922        | 205.5       | 37          | 82.3        | 317.4       | 845         | 1077        | 570         |
|    | Mean           | 2243.625    | 213.425     | 40.75       | 125.1125    | 422.25      | 1387.25     | 856.375     | 490.375     |
|    | Std. Deviation | 705.4248846 | 47.98117935 | 4.978525312 | 31.32632109 | 71.85688157 | 542.5394653 | 264.5891357 | 35.89244847 |

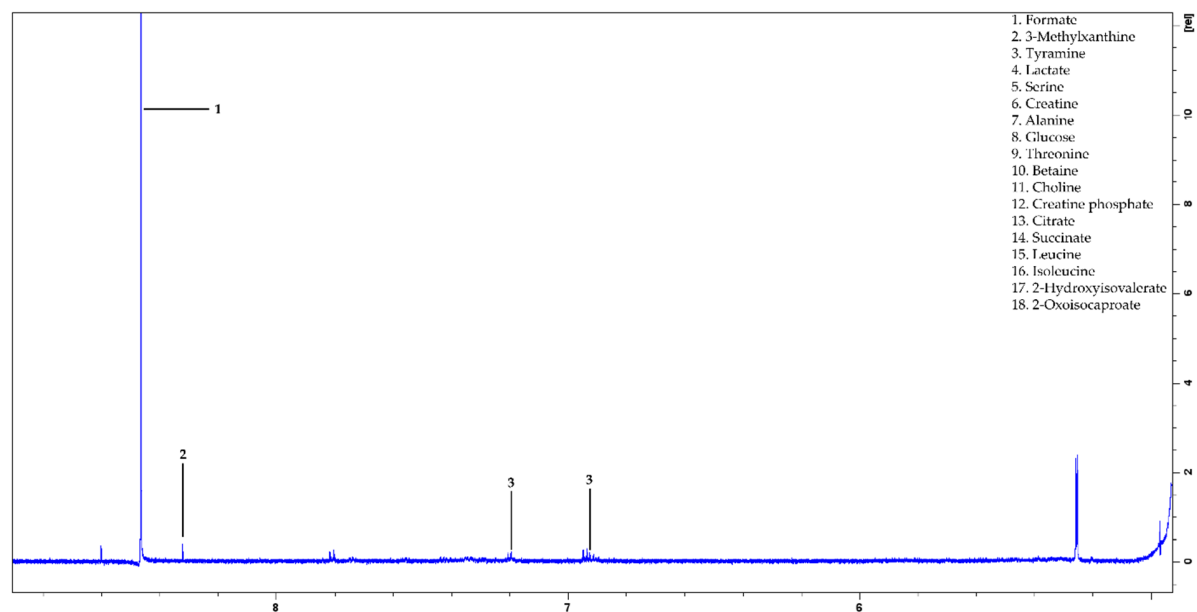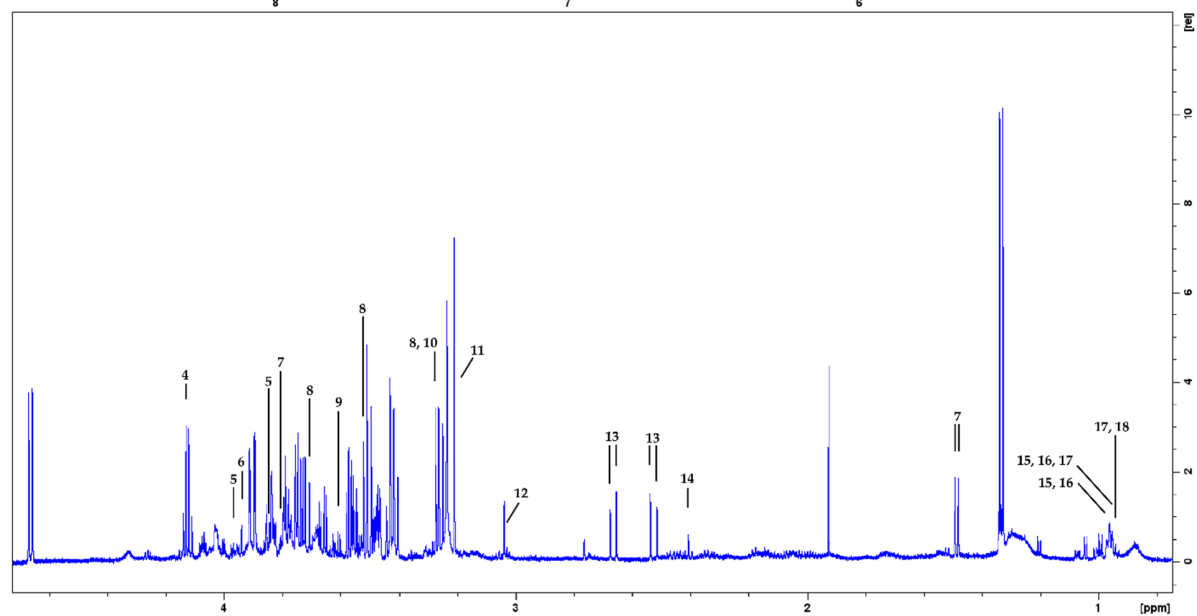

**Figure S1:** Labelled  $^1\text{H}$  NMR spectra of rat plasma metabolome. All metabolites identified as significant by Mann-Whitney U and VIAVC testing from each comparison are represented and indicated.
